## Correction

*Molecular action of sulphonylureas on  $K_{ATP}$  channels: a real partnership between drugs and nucleotides*

Heidi de Wet and Peter Proks

Volume 43 (2015) pp 901–907

1. In the ‘Introduction’ section, the sentence

“These drugs share a common mechanism of action, which is also the case for the previously developed anti-hyperglycaemic drugs, glinides [2].”

should read

“These drugs share a common mechanism of action, which is also the case for the more recently developed anti-hyperglycaemic drugs, glinides [2].”

2. In the legend to Figure 1, the sentence

“The line for data obtained for excised patches is drawn according to equation:”

should read

“The line for data obtained for excised patches is drawn according to the equation below:”

and the sentence

“ $P_O$  is primary determined by the stability of channel open state; it can be reduced by factors such as channel rundown or increased by channel mutations or via Mg-nt activation of the channel [24,35].”

should read

“ $P_O$  is primarily determined by the stability of channel open state; it can be reduced by factors such as channel rundown or increased by channel mutations or via Mg-nt activation of the channel [24,35].”

3. In the legend to Figure 3, the sentence

“ $I_C$  is the current in drug free solution obtained by averaging the current before and after application,  $IC_{50}$  is the drug concentration at which the inhibition is half maximal,  $b$  is the Hill coefficient,  $L$  is a scaling factor reflecting the difference between channel activity in control and MgATP-containing solution ( $L = 1$  in the absence of the nt) and  $a$  is the fraction of  $K_{ATP}$  current remaining at gliclazide concentrations that saturate the high-affinity-binding site on SUR1.”

should read

“ $I_C$  is the current in drug-free solution obtained by averaging the current before and after drug application,  $IC_{50}$  is the drug concentration at which the inhibition is half maximal,  $b$  is the Hill coefficient,  $L$  is a scaling factor reflecting the difference between channel activity in control and MgATP-containing solution ( $L = 1$  in the absence of the nt) and  $a$  is the fraction of  $K_{ATP}$  current remaining at gliclazide concentrations that saturate the high-affinity-binding site on SUR1.”

4. In the ‘Concluding remarks’ section, the sentence

“Drug-induced stimulation of insulin exocytosis via Epac2 (cAMP-activated guanine-nt exchange factor). It has recently been demonstrated that binding of sulphonylureas to this protein requires cAMP [45].”

should read

“For example, sulphonylurea-induced stimulation of insulin exocytosis via Epac2 (cAMP-activated guanine-nt exchange factor) has recently been demonstrated to be cAMP-dependent since binding of sulphonylureas to this protein requires cAMP [45].”
